# Supplementary material for: Why do students skip classroom lectures: A single dental school report
Source: PubMed Central journal article supplement (PMC8293555; doi:10.1186/s12909-021-02824-3), 2021-07-20
Supplement: 12909_2021_2824_MOESM1_ESM.pdf [file 12909_2021_2824_MOESM1_ESM.pdf]

## **Student attendance survey**

You are invited to participate in this survey on KAU-FD student attendance. This is a research project being conducted and it should take approximately 3 minutes to complete.

### **PARTICIPATION**

Your participation in this survey is voluntary. You may refuse to take part in the research or exit the survey at any time without penalty. You are free to decline to answer any particular question you do not wish to answer for any reason.

### **BENEFITS**

You will receive no direct benefits from participating in this research study. However, your responses may help us learn more about student attendance behavior at KAU-FD.

### **RISKS**

There is the risk that you may find some of the questions to be sensitive.

### **CONFIDENTIALITY**

Your survey answers will be stored in a password protected electronic format. We are not collecting identifying information such as your name, email address. Therefore, your responses will remain anonymous. No one will be able to identify you or your answers, and no one will know whether or not you participated in the study.

### **CONTACT**

If you have questions at any time about the study or the procedures, you may contact the research supervisor, Dr. Hani Mawardi via email at [hmawardi@kau.edu.sa](mailto:hmawardi@kau.edu.sa).

Please select your choice below. You may print a copy of this consent form for your records. Clicking on the "Agree" button indicates that:

- You have read the above information
- You voluntarily agree to participate
- You are 18 years of age or older

Agree

Disagree

## Dental Students' Attendance: A Survey

**1- Age:**

18-20    21-25    26-30    31-35

**2- Current Dental Year:**

2<sup>nd</sup> year    3<sup>rd</sup> year    4<sup>th</sup> year    5<sup>th</sup> year    6<sup>th</sup> year

**3- Gender:**

Male    Female

**4- Marital status:**

Single    Married    Divorced    Widowed

**5- Number of children:**

1    2     >2    None

**6- Your academic average for the last year (GPA):**

<2.74     2.75-3.74     3.75-4.49     4.50 -5.00

**7- How much time on average do you need to reach the dental school?**

<30 minutes     30-60 minutes     61-120 minutes     >120 minutes

**8- Do you think attending classes should be optional for students?**

Yes    No

**9- Do you think attendaning classes have a positive influence on students' performance?**

Yes     No

**10- How many times per month on average do you skip a lecture?**

1-2 times    3-4 times    5-6 times    More than 6

**11- How many times per month on average you are late to a lecture?**

1-2 times    3-4 times    5-6 times    More than 6

**12- If KAU-FD installs video recording devices in classrooms to record live lectures and make it available, are you:**

More likely to skip or be late to a lecture    Less likely to skip or be late to a lecture  
No difference

**13- What are the top 3 subjects you are more likely to skip or be late for their lectures?**

- |                                                                         |                                                         |                                               |
|-------------------------------------------------------------------------|---------------------------------------------------------|-----------------------------------------------|
| <input type="checkbox"/> Anatomy                                        | <input type="checkbox"/> General Histology & Embryology | <input type="checkbox"/> Biochemistry         |
| <input type="checkbox"/> Microbiology                                   | <input type="checkbox"/> General and Systemic Pathology | <input type="checkbox"/> Dental anatomy       |
| <input type="checkbox"/> Oral Histology                                 | <input type="checkbox"/> Oral pathology                 | <input type="checkbox"/> Oral Biology         |
| <input type="checkbox"/> Oral radiology                                 | <input type="checkbox"/> General medicine               | <input type="checkbox"/> General Surgery      |
| <input type="checkbox"/> Operative & Esthetic Dentistry                 | <input type="checkbox"/> Removable Prosthodontics       | <input type="checkbox"/> Fixed Prosthodontics |
| <input type="checkbox"/> Periodontics                                   | <input type="checkbox"/> Endodontics                    | <input type="checkbox"/> Orthodontics         |
| <input type="checkbox"/> Oral Surgery                                   | <input type="checkbox"/> Pediatric Dentistry            | <input type="checkbox"/> Pharmacotherapeutics |
| <input type="checkbox"/> Biomaterial                                    | <input type="checkbox"/> Pain Control                   | <input type="checkbox"/> Oral medicine        |
| <input type="checkbox"/> Biostatistics & Methods of Scientific Research |                                                         |                                               |
| <input type="checkbox"/> Professional Ethics & Law, Practice Management |                                                         |                                               |

**14- Choose from the list the top 3 reasons for why would you be late or absent from a lecture?**

- The lecture is before or after an examination  
Early morning class (8-9 am)  
Late class (3-5 pm)  
If I have two or more-hour breaks before or after a class  
Lecture material is available through Blackboard, video or voice recording or another source  
The lecturer is below expectations (e.g. read directly from the slides, lacks clarity and organization)  
The lecturer is not strict about student attendance  
I am not interested in a specific topic  
I can learn the subject of the day better by spending the same time studying at home  
I don't wake up early  
Difficulty with transportation

I don't feel attending classes benefits me

other, please explain. ....
